# Supplementary material for: Increased Dietary Trp, Thr, and Met Supplementation Improves Performance, Health, and Protein Metabolism of Weaned Piglets under Mixed Management and Poor Housing Conditions
Source: MDPI journal article supplement (doi:10.3390/ani14081143), 2024-04-09
Supplement: s1 [file s1]

## Supplementary Material

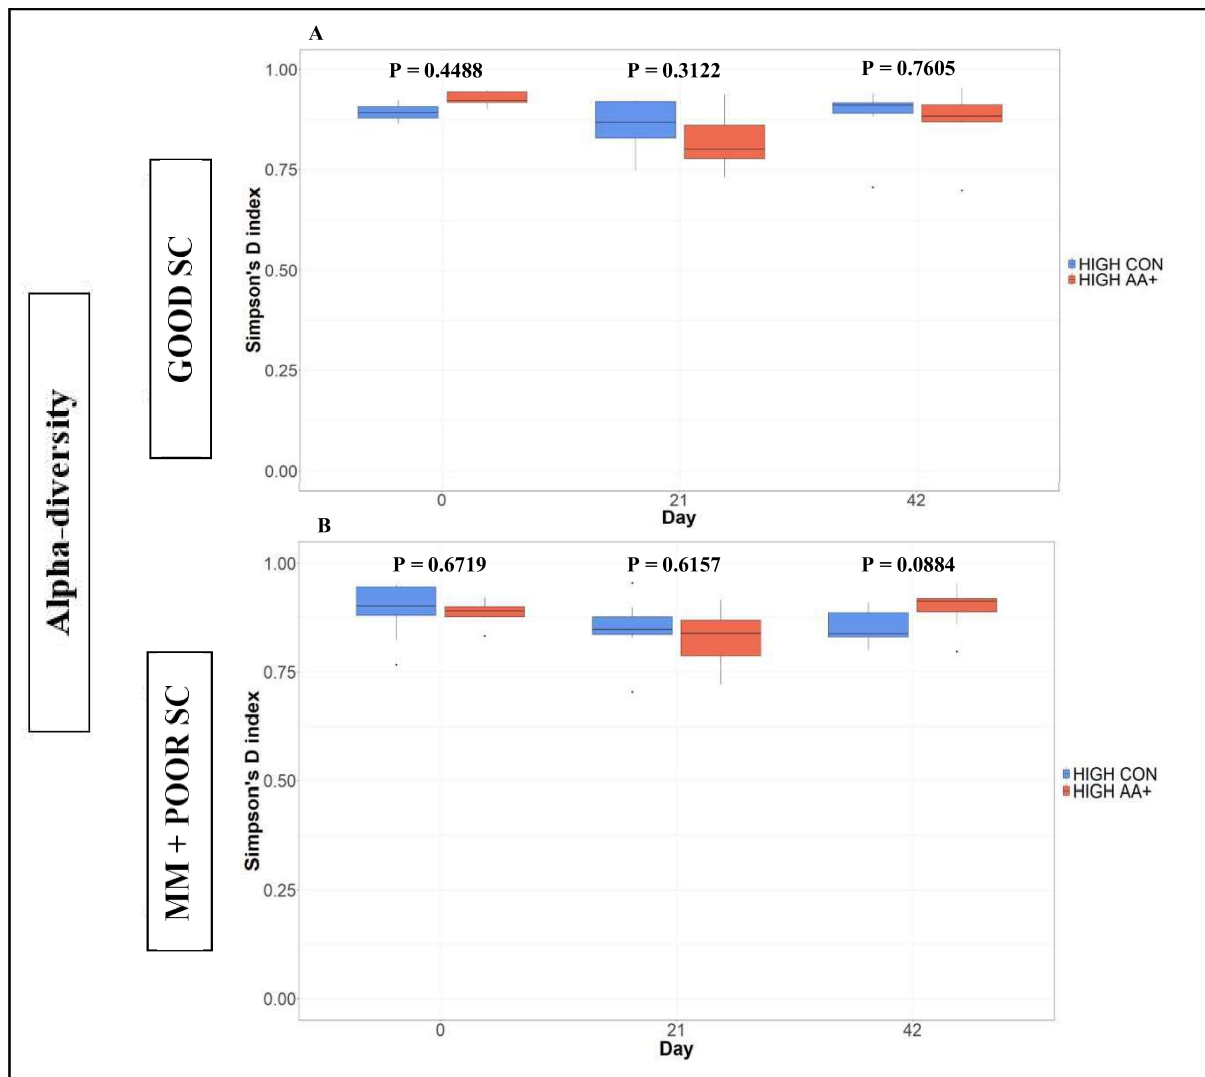

**Figure S1.** Alpha-diversity (Simpson's D index) analysis of fecal microbiome samples across piglets with High Sanitary Status (HSS), housed in a good or poor sanitary condition (SC), and feeding a control (CON) or surplus supplemented diet with amino acids (AA+). Figure S1A shows no significant difference in alpha-diversity (Simpson's D Index) between diets (CON vs. AA+) across HSS piglets under GOOD SC over time. Figure S1B shows no significant difference in alpha-diversity (Simpson's D Index) between diets (CON vs. AA+) across HSS piglets under mixed management and poor sanitary condition (MM+POOR SC) over time. Alpha-diversity comparison between diet groups was done using a Welch two sample T-test ( $P < 0.05$ ). The sample size for the fecal samples was: **GOOD SC** (Figures S1A) on day 0, CON (n=2) and AA+ (n=5); on day 21, CON (n=7) and AA+ (n=7); and on day 42, CON (n=8) and AA+ (n=8); and **MM + POOR SC** (Figures S1B) on day 0, HSS CON (n=10), HSS AA+ (n=7); on day 21, HSS CON (n=7), HSS AA+ (n=7); and on day 42, HSS CON (n=7), HSS AA+ (n=8). Each piglet was considered SC an experimental unit throughout the analysis.

**Table S2** - Serological results of the health monitoring program of the high and low sanitary status farms.

| Characteristics                     | High Sanitary Status                                                                                                              | Low Sanitary Status                                                                                                 |
|-------------------------------------|-----------------------------------------------------------------------------------------------------------------------------------|---------------------------------------------------------------------------------------------------------------------|
| Seronegative to antibodies against: | <i>Mycoplasma hyopneumoniae</i> ,<br><i>Actinobacillus pleuropneumoniae</i> (APP),<br>Swine Influenza H1N1                        | <i>M. hyopneumoniae</i> , <i>Actinobacillus pleuropneumoniae</i> (APP), Swine Influenza H1N1, Porcine               |
| Seropositive to antibodies against: | Porcine circovirus type 2,<br><i>Glaesserella parasuis</i> ,<br><i>Pasteurella multocida</i> ,<br><i>Lawsonia intracellularis</i> | circovirus type 2, <i>Glaesserella parasuis</i> , <i>Pasteurella multocida</i> ,<br><i>Lawsonia intracellularis</i> |
