# Supplementary material for: Increased Dietary Trp, Thr, and Met Supplementation Improves Performance, Health, and Protein Metabolism of Weaned Piglets under Mixed Management and Poor Housing Conditions
Source: MDPI journal article supplement (doi:10.3390/ani14081143), 2024-04-09
Supplement: s1 [file s1]

Table S1. Forward and reverse sequence reads per samples.

| sample ID    | forward sequence count | reverse sequence count |
|--------------|------------------------|------------------------|
| D0JA5-3A2    | 68940                  | 68940                  |
| D0JA203      | 60591                  | 60591                  |
| D0JA227      | 60468                  | 60468                  |
| D0JA46       | 57553                  | 57553                  |
| D0JA220      | 53467                  | 53467                  |
| D0JA25       | 53195                  | 53195                  |
| D0JA116      | 52356                  | 52356                  |
| D0JA5        | 52071                  | 52071                  |
| D0JA52       | 50577                  | 50577                  |
| D0JA250      | 50091                  | 50091                  |
| D0JA81       | 49157                  | 49157                  |
| D0JA219      | 44563                  | 44563                  |
| D0JA107-3A9  | 44315                  | 44315                  |
| D0JA215      | 42769                  | 42769                  |
| D0JA141      | 42514                  | 42514                  |
| D0JA107      | 42229                  | 42229                  |
| D0JA101-3A8  | 36135                  | 36135                  |
| D0JA230      | 32176                  | 32176                  |
| D0JA101      | 32093                  | 32093                  |
| D0JA231      | 32086                  | 32086                  |
| D0JA130      | 32012                  | 32012                  |
| D0JA10       | 30220                  | 30220                  |
| D0JA55       | 30038                  | 30038                  |
| D0JA114      | 29678                  | 29678                  |
| D0JA206      | 29259                  | 29259                  |
| D0JA62       | 27582                  | 27582                  |
| D0JA79       | 27323                  | 27323                  |
| D0JA114-3A10 | 27128                  | 27128                  |
| D0JA116-3A11 | 26647                  | 26647                  |
| D0JA133      | 26318                  | 26318                  |
| D0JA205      | 25863                  | 25863                  |
| D0JA105      | 25314                  | 25314                  |
| D0JA51       | 22257                  | 22257                  |
| D0JA217      | 22075                  | 22075                  |
| D0JA128      | 19478                  | 19478                  |
| D0JA210      | 18062                  | 18062                  |
| D0JA12       | 17214                  | 17214                  |
| D0JA127      | 16696                  | 16696                  |
| D0JA2        | 15448                  | 15448                  |
| D0JA73       | 14583                  | 14583                  |
| D0JA57       | 3155                   | 3155                   |
| D0JA140      | 15148                  | 15148                  |
| D21JA219     | 39689                  | 39689                  |
| D21JA51      | 37390                  | 37390                  |
| D21JA101     | 36060                  | 36060                  |
| D21JA107     | 34489                  | 34489                  |
| D21JA116     | 33992                  | 33992                  |
| D21JA250     | 32162                  | 32162                  |
| D21JA2       | 31374                  | 31374                  |
| D21JA203     | 30058                  | 30058                  |
| D21GA92      | 29289                  | 29289                  |

|             |       |       |
|-------------|-------|-------|
| D21JA127    | 26281 | 26281 |
| D21JA15     | 25362 | 25362 |
| D21JA30     | 25069 | 25069 |
| D21JA230    | 24642 | 24642 |
| D21JA114    | 23359 | 23359 |
| D21JA231    | 23201 | 23201 |
| D21JA5      | 22889 | 22889 |
| D21JA9      | 22759 | 22759 |
| D21GA29     | 22249 | 22249 |
| D21JA217    | 22063 | 22063 |
| D21JA10     | 22053 | 22053 |
| D21JA139    | 19997 | 19997 |
| D21JA45     | 19777 | 19777 |
| D21JA215    | 17528 | 17528 |
| D21JA81     | 16666 | 16666 |
| D21JA57     | 16053 | 16053 |
| D21JA25     | 15767 | 15767 |
| D21JA206    | 15537 | 15537 |
| D21JA55     | 15497 | 15497 |
| D21JA140    | 14852 | 14852 |
| D21JA13     | 14450 | 14450 |
| D21JA105    | 13437 | 13437 |
| D21JA205    | 12114 | 12114 |
| D21JA90     | 11561 | 11561 |
| D21JA69     | 11244 | 11244 |
| D21JA62     | 10647 | 10647 |
| D21JA52     | 9998  | 9998  |
| D21JA227    | 9432  | 9432  |
| D21JA141    | 8765  | 8765  |
| D21JA220    | 7566  | 7566  |
| D21JA128    | 6844  | 6844  |
| D21JA46     | 6367  | 6367  |
| D21JA84     | 5252  | 5252  |
| D21JA210    | 4601  | 4601  |
| D21JA112    | 36308 | 36308 |
| D21JA133    | 33593 | 33593 |
| D21JA141-B9 | 10703 | 10703 |
| D42JA60     | 54075 | 54075 |
| D42JA5      | 49864 | 49864 |
| D42JA20     | 43912 | 43912 |
| D42JA81     | 41242 | 41242 |
| D42JA2      | 32775 | 32775 |
| D42JA62     | 32182 | 32182 |
| D42JA203    | 30863 | 30863 |
| D42JA69     | 30155 | 30155 |
| D42JA227    | 29397 | 29397 |
| D42JA15     | 29169 | 29169 |
| D42JA133    | 28779 | 28779 |
| D42JA107    | 28245 | 28245 |
| D42JA46     | 27214 | 27214 |
| D42JA219    | 26774 | 26774 |
| D42JA141    | 25270 | 25270 |
| D42JA215    | 25075 | 25075 |

|          |             |       |
|----------|-------------|-------|
| D42JA9   | 23988       | 23988 |
| D42JA205 | 23827       | 23827 |
| D42JA112 | 22523       | 22523 |
| D42JA6   | 21543       | 21543 |
| D42JA210 | 21352       | 21352 |
| D42JA55  | 21121       | 21121 |
| D42JA249 | 21033       | 21033 |
| D42JA45  | 20719       | 20719 |
| D42JA250 | 20110       | 20110 |
| D42JA13  | 20045       | 20045 |
| D42JA101 | 19398       | 19398 |
| D42JA140 | 19109       | 19109 |
| D42JA128 | 18702       | 18702 |
| D42JA124 | 17643       | 17643 |
| D42JA116 | 15423       | 15423 |
| D42JA139 | 15328       | 15328 |
| D42JA220 | 14855       | 14855 |
| D42JA57  | 14793       | 14793 |
| D42JA206 | 14370       | 14370 |
| D42JA105 | 14121       | 14121 |
| D42JA90  | 12564       | 12564 |
| D42JA84  | 12356       | 12356 |
| D42JA95  | 9166        | 9166  |
| D42JA217 | 9024        | 9024  |
| D42JA22  | 8959        | 8959  |
| D42JA127 | 6839        | 6839  |
| D42JA231 | 5630        | 5630  |
| D42JA52  | 16942       | 16942 |
| sum      | 3384304     |       |
| average  | 25638,66667 |       |
